# Supplementary material for: Nanomaterial Ecotoxicology in the Terrestrial and Aquatic Environment: A Systematic Review
Source: MDPI journal article supplement (doi:10.3390/toxics10070393), 2022-07-14
Supplement: s1 [file Gambardella & Pinsino_Table S1.xlsx]

## Sheet: Suppl Mat. 1_Water
Environment	Compartment	Target organisms	Organism	Endpoint/Response	Nanomaterial	Uptake/accumulation	Article Title	Journal	Published year	DOI
Aquatic	Freshwater	bacteria	bacteria	bioluminescence inhibition	Ag, ZnO and TiO2 NPs	No	Silver, zinc oxide and titanium dioxide nanoparticle ecotoxicity to bioluminescent Pseudomonas putida in laboratory medium and artificial wastewater	Environmental Pollution	2014	10.1016/j.envpol.2014.09.002
Aquatic	Freshwater	bacteria	bacteria	ROS production, gene expression	CNT	No	Carbon nanotubes influence the toxic effects of chloramphenicol and tetracycline on cyanobacterium Synechocystis sp. in different ways	Environmental Science-Nano	2021	10.1039/d0en01204a
Aquatic	Freshwater	bacteria	bacteria	cell density, chlorophyll a, ROS, MDA	plastics	No	Unraveling individual and combined toxicity of nano/microplastics and ciprofloxacin to Synechocystis sp. at the cellular and molecular levels	Environment International	2021	10.1016/j.envint.2021.106842
Aquatic	Freshwater	bacteria	microorganisms	growth, viability	Barium titanate NPs	No	Ecotoxicological studies of micro- and nanosized barium titanate on aquatic photosynthetic microorganisms	Aquatic Toxicology	2014	10.1016/j.aquatox.2014.05.005
Aquatic	Freshwater	bacteria	biofilm	ROS production, development	TiO2, CeO2, Fe3O4 NPs	No	Environmental implications and applications of carbon nanomaterials in water treatment	Water science & technology	2013	10.2166/wst.2013.167
Aquatic	Freshwater	bacteria	biofilm	photosynthesis	Graphene oxide, CNT	No	Microscale and molecular analyses of river biofilm communities treated with microgram levels of cerium oxide nanoparticles indicate limited but significant effects	Environmental Pollution	2020	10.1016/j.envpol.2019.113515
Aquatic	Freshwater	bacteria	microbes	growth inhibition, oxidative stress	Al powder	No	Multi-omics analyses reveal molecular mechanisms for the antagonistic toxicity of carbon nanotubes and ciprofloxacin to Escherichia coli	Science of the Total Environment	2020	10.1016/j.scitotenv.2020.138288
Aquatic	Freshwater	bacteria	microbes	inhibition, gene expression	Ag and Ag2S NPs	No	Effects of Ag and Ag2S nanoparticles on denitrification in sediments	Water Research	2018	10.1016/j.watres.2018.02.067
Aquatic	Freshwater	bacteria	bacterial community	oxygen uptake (metabolic rate)	Ag NPs	No	Changes in bacterial diversity of activated sludge exposed to titanium dioxide nanoparticles	Biodegradation	2021	10.1007/s10532-021-09939-w
Aquatic	Freshwater	bacteria	microbes	cell density, diversity	Cd-based quantum dots	No	AgNPs Change Microbial Community Structures of Wastewater	Frontiers in Microbiology	2018	10.3389/fmicb.2018.03211
Aquatic	Freshwater	bacteria	biofilm	morphology, viability	Ni NPs	No	Pseudomonas putida biofilm dynamics following a single pulse of silver nanoparticles	Chemosphere	2016	10.1016/j.chemosphere.2016.03.060
Aquatic	Freshwater	protozoa	protozoan	growth inhibition	Graphene oxide	No	Ecotoxicological effects of graphene oxide on the protozoan Euglena gracilis	Chemosphere	2015	10.1016/j.chemosphere.2015.01.040
Aquatic	Freshwater	protozoa	protozoan	survival	CNT	No	Carbon nanotube compared with carbon black: effects on bacterial survival against grazing by ciliates and antimicrobial treatments	Nanotoxicology	2013	10.3109/17435390.2011.652205
Aquatic	Freshwater	plant	macrophyta	growth, chlorophyll content, enzyme activity (SOD, CAT, peroxidase activity)	ZnO NPs	No	Evaluation of growth and biochemical indicators of Salvinia natans exposed to zinc oxide nanoparticles and zinc accumulation in plants	Environmental Science and Pollution Research	2014	10.1007/s11356-013-1970-9
Aquatic	Freshwater	plant	macrophyta	growth, photosynthesis	CuO NPs	No	Effect of soluble copper released from copper oxide nanoparticles solubilisation on growth and photosynthetic processes of Lemna gibba L	Nanotoxicology	2014	10.3109/17435390.2013.789936
Aquatic	Freshwater	plant	macrophyta	oxidative stress	TiO2 NPs	No	Oxidative stress mediated toxicity of TiO2 nanoparticles after a concentration and time dependent exposure of the aquatic macrophyte Hydrilla verticillata	Aquatic Toxicology	2017	10.1016/j.aquatox.2017.06.006
Aquatic	Freshwater	plant	macrophyta	development	MWCNT, C-60	Yes	Community effects of carbon nanotubes in aquatic sediments	Environmental International	2011	10.1016/j.envint.2011.01.016
Aquatic	Freshwater	algae	algae	growth	ZnO and CuO NPs	No	Combined ecotoxicity of binary zinc oxide and copper oxide nanoparticles to Scenedesmus obliquus	Journal of Environmental Science and Health, Part A	2017	10.1080/10934529.2017.1284434
Aquatic	Freshwater	algae	algae	growth, metabolism	TiO2 NPs	No	Effects of TiO2 nanoparticles on the growth and metabolism of three species of freshwater algae	Journal of Nanoparticle Research	2012	10.1007/s11051-012-0913-6
Aquatic	Freshwater	algae	algae	growth inhibition	Ag NPs	Yes	The role of exopolymeric substances in the bioaccumulation and toxicity of Ag nanoparticles to algae	Scientific Reports	2016	10.1038/srep32998
Aquatic	Freshwater	algae	algae	behaviour	TiO2 NPs	No	Evaluation of charge and agglomeration behavior of TiO2 nanoparticles in ecotoxicological media	Science of The Total Environment	2015	10.1016/j.scitotenv.2014.11.057
Aquatic	Freshwater	algae	algae	growth	Paclitaxel-loaded nanomedicin	No	Ecotoxic effects of paclitaxel-loaded nanotherapeutics on freshwater algae, Raphidocelis subcapitata and Chlamydomonas reinhardtii	Environmental Science - Nano	2017	10.1039/c6en00332j
Aquatic	Freshwater	algae	algae	growth	Ag NPs	No	Perturbation of fatty acid composition, pigments, and growth indices of Chlorella vulgaris in response to silver ions and nanoparticles: A new holistic understanding of hidden ecotoxicological aspect of pollutants	Chemosphere	2020	10.1016/j.chemosphere.2019.124576
Aquatic	Freshwater	algae	algae	growth rate, chlorophyll, oxidative stress	Polystyrene NPs	Yes	The influence of nanoplastics on the toxic effects, bioaccumulation, biodegradation and enantioselectivity of ibuprofen in freshwater algae Chlorella pyrenoidosa	Environmental Pollution	2020	10.1016/j.envpol.2020.114593
Aquatic	Freshwater	algae	algae	photosynthetic activity, cellular morphology, oxidative stress	Ag NPs	No	Quantification of silver nanoparticle toxicity to algae in soil via photosynthetic and flow-cytometric analyses	Scientific Reports	2018	10.1038/s41598-017-18680-5
Aquatic	Freshwater	algae	algae	morphology, chlorophyll content, gene expression	Cu NPs	No	Copper status of exposed microorganisms influences susceptibility to metallic nanoparticles	Environmental Toxicology and Chemistry	2016	10.1002/etc.3254
Aquatic	Freshwater	algae	algae	growth	SiO and Al2O3 NPs	No	Toxicity evaluation based on particle size, contact angle and zeta potential of SiO2 and Al2O3 on the growth of green algae	Advances in Nano Research	2015	10.12989/anr.2015.3.4.243
Aquatic	Freshwater	algae	algae	growth	Nanoclay	No	Physical and chemical characterization of natural and modified nanoclays and their ecotoxicity on a freshwater algae species (Chlamydomonas reinhardtii)	Environmental Toxicology and Chemistry	2018	10.1002/etc.4244
Aquatic	Freshwater	algae	algae	chlorophyll	Silica NPs	No	Nano-fumed silica as a novel pollutant that inhibits the algicidal effect of p-hydroxybenzoic acid on Microcystis aeruginosa	Environmental Technology	2019	10.1080/09593330.2017.1404135
Aquatic	Freshwater	algae	algae	growth	Silica-coated CdSe/ZnS quantum dots	Yes	Ecotoxicology impact of silica-coated CdSe/ZnS quantum dots internalized in Chlamydomonas reinhardtii algal cells	Science of The Total Environment	2019	10.1016/j.scitotenv.2019.02.274
Aquatic	Freshwater	algae	algae	growth	TiO2 and CeO2 NPs	No	Towards the standardization of nanoecotoxicity testing: Natural organic matter 'camouflages' the adverse effects of TiO2 and CeO2 nanoparticles on green microalgae	Science of The Total Environment	2016	10.1016/j.scitotenv.2015.10.137
Aquatic	Freshwater	algae	algae	phosynthetic activity	CNT	No	Diuron Sorbed to Carbon Nanotubes Exhibits Enhanced Toxicity to Chlorella vulgaris	Environmental Science and Technology	2013	10.1021/es304016u
Aquatic	Freshwater	algae	algae	growth	CNT	No	Carbon Nanotube Properties Influence Adsorption of Phenanthrene and Subsequent Bioavailability and Toxicity to Pseudokirchneriella subcapitata	Environmental Science and Technology	2016	10.1021/acs.est.5b05177
Aquatic	Freshwater	algae	algae	growth, morphology, chlorophyll fluorescence, oxidative stress, membrane permeabilization	CuO NPs	No	Dynamics of sub-lethal effects of nano-CuO on the microalga Chlamydomonas reinhardtii during short-term exposure	Aquatic Toxicology	2015	10.1016/j.aquatox.2015.02.010
Aquatic	Freshwater	algae	algae	chlorophyll fluorescence	Carbon NMs	No	Are fluorescence-based chlorophyll quantification methods suitable for algae toxicity assessment of carbon nanomaterials?	Nanotoxicology	2017	10.1080/17435390.2017.1329953
Aquatic	Freshwater	algae	algae	growth, gene expression	CeO2 NPs	No	Insights into the effect of cerium oxide nanoparticle on microalgal degradation of sulfonamides	Bioresource Technology	2020	10.1016/j.biortech.2020.123452
Aquatic	Freshwater	algae	algae	growth, morphology	ZnO NPs	No	The impact of morphology and size of zinc oxide nanoparticles on its toxicity to the freshwater microalga, Raphidocelis subcapitata	Environmental Science and Pollution Research	2019	10.1007/s11356-018-3787-z
Aquatic	Freshwater	algae	algae	photosynthesis	Ag NPs	No	Toxicity of Silver Nanoparticles to Chlamydomonas reinhardtii	Environmental Science and Technology	2008	10.1021/es801785m
Aquatic	Freshwater	algae	algae	growth	Silica NPs	No	Ecotoxicity of silica nanoparticles to the green alga Pseudokirchneriella subcapitata: Importance of surface area	Environmental Toxicology and Chemistry	2008	10.1897/07-634.1
Aquatic	Freshwater	algae	algae	growth, oxidative stress	ZnO NPs	No	Toxicity assessment of ZnO nanoparticles to freshwater microalgae Coelastrella terrestris	Environmental Science and Pollution Research	2019	10.1007/s11356-019-05844-1
Aquatic	Freshwater	invertebrate	hydroids	development, reproduction	Carbon NPs	No	Impact of Carbon Nano-Onions on Hydra vulgaris as a Model Organism for Nanoecotoxicology	Nanomaterials	2015	10.3390/nano5031331
Aquatic	Freshwater	invertebrate	hydroids	feeding, growth, regeneration, oxidative stress	CuO nanorods	No	Hydra as a model organism to decipher the toxic effects of copper oxide nanorod: Eco-toxicogenomics approach	Scientific Reports	2016	10.1038/srep29663
Aquatic	Freshwater	invertebrate	shrimp	survival, metabolism	Graphene oxide	No	Co-exposure of graphene oxide with trace elements: Effects on acute ecotoxicity and routine metabolism in Palaemon pandaliformis (shrimp)	Chemosphere	2019	10.1016/j.chemosphere.2019.02.017
Aquatic	Freshwater	invertebrate	shrimp	mortality	GO	No	Ecotoxicology of Manufactured Graphene Oxide Nanomaterials and Derivation of Preliminary Guideline Values for Freshwater Environments	Environmental Toxicology and Chemistry	2018	10.1002/etc.4074
Aquatic	Freshwater	invertebrate	anellid	feeding	CNT	Yes	The fate of cerium oxide nanoparticles in sediments and their routes of uptake in a freshwater worm	Nanotoxicology	2019	10.1080/17435390.2019.1593540
Aquatic	Freshwater	invertebrate	crustacean	fitness, reproduction	TiO2 NPs	No	Effects of nanoparticles of TiO2 on food depletion and life-history responses of Daphnia magna	Aquatic Toxicology	2013	10.1016/j.aquatox.2013.01.005
Aquatic	Freshwater	invertebrate	crustacean	molting	CeO2 NPs	No	Role of molting on the biodistribution of CeO2 nanoparticles within Daphnia pulex	Water Research	2013	10.1016/j.watres.2012.11.063
Aquatic	Freshwater	invertebrate	crustacean	metabolic rate	Ag NPs	No	Co-exposure of carbon nanotubes with carbofuran pesticide affects metabolic rate in Palaemon pandaliformis (shrimp)	Chemosphere	2021	10.1016/j.chemosphere.2021.132359
Aquatic	Freshwater	invertebrate	crustacean	survival, oxidative stress, moulting	Au NMs	No	Shape and Charge of Gold Nanomaterials Influence Survivorship, Oxidative Stress and Moulting of Daphnia magna	Nanomaterials	2016	10.3390/nano6120222
Aquatic	Freshwater	invertebrate	crustacean	growth, mortality, reproduction	TiO2, Ag NPs	No	Exposure medium and particle ageing moderate the toxicological effects of nanomaterials to Daphnia magna over multiple generations: a case for standard test review?	Environmental Science-Nano	2020	10.1039/d0en00049c
Aquatic	Freshwater	invertebrate	crustacean	enzyme activity	Au NPs	No	Nano-eco toxicity study of gold nanoparticles on aquatic organism Moina macrocopa: As new versatile ecotoxicity testing model	Environmental Toxicology and Pharmacology	2019	10.1016/j.etap.2019.02.013
Aquatic	Freshwater	invertebrate	crustacean	survival, reproduction	ZnO NMs	No	Can the surface modification and/or morphology affect the ecotoxicity of zinc oxide nanomaterials?	Chemosphere	2019	10.1016/j.chemosphere.2019.02.093
Aquatic	Freshwater	invertebrate	crustacean	survival, enzyme activity	C-60	No	Toxicity biomarker expression in daphnids exposed to manufactured nanoparticles: Changes in toxicity with functionalization	Environmental Pollution	2009	10.1016/j.envpol.2008.11.010
Aquatic	Freshwater	invertebrate	crustacean	immobilization	TiO2, Ag	No	Ecotoxicological read-across models for predicting acute toxicity of freshly dispersed versus medium-aged NMs to Daphnia magna	Chemosphere	2021	10.1016/j.chemosphere.2021.131452
Aquatic	Freshwater	invertebrate	crustacean	mortality, immobility, heartbeat rate, feeding activity, ROS production	Graphene	No	Ecotoxicity Assessment of Graphene Oxide by Daphnia magna through a Multimarker Approach from the Molecular to the Physiological Level including Behavioral Changes	Nanomaterials	2020	10.3390/nano10102048
Aquatic	Freshwater	invertebrate	crustacean	histological changes	CNF	No	The toxic influence and biodegradation of carbon nanofibers in freshwater invertebrates of the families Gammaridae, Ephemerellidae, and Chironomidae	Toxicology Reports	2020	10.1016/j.toxrep.2020.07.011
Aquatic	Freshwater	invertebrate	crustacean	surival, reproduction, growth	Fullerene	No	EFFECTS OF FUNCTIONALIZED FULLERENES ON BIFENTHRIN AND TRIBUFOS TOXICITY TO DAPHNIA MAGNA: SURVIVAL, REPRODUCTION, AND GROWTH RATE	Environmental Toxicology and Chemistry	2010	10.1002/etc.318
Aquatic	Freshwater	invertebrate	crustacean	feeding, reproduction	Graphene oxide	Yes	Chronic toxicity in Ceriodaphnia dubia induced by graphene oxide	Chemosphere	2018	10.1016/j.chemosphere.2017.10.018
Aquatic	Freshwater	invertebrate	crustacean	mortality	Ag NPs	No	Green Synthesis and Characterization of Silver Nanoparticles (AgNPs) Using Leaf Extract of Solanum nigrum and Assessment of Toxicity in Vertebrate and Invertebrate Aquatic Animals	Journal of Cluster Science	2020	10.1007/s10876-019-01704-7
Aquatic	Freshwater	invertebrate	crustacean	immobilization	TiO2 NPs	No	Acute toxicity of nanosized TiO2 to Daphnia magna under UVA irradiation	Environmental Toxicology and Chemistry	2012	10.1002/etc.1981
Aquatic	Freshwater	invertebrate	crustacean	immobilization, molting	TiO2 NPs	No	Biological Surface Coating and Molting Inhibition as Mechanisms of TiO2 Nanoparticle Toxicity in Daphnia magna	Plos One	2011	10.1371/journal.pone.0020112
Aquatic	Freshwater	invertebrate	crustacean	enzyme activity	Ag NPs	No	Moina macrocopa as a non-target aquatic organism for assessment of ecotoxicity of silver nanoparticles: Effect of size	Chemosphere	2019	10.1016/j.chemosphere.2018.12.031
Aquatic	Freshwater	invertebrate	crustacean	reproduction	Diamond NP	Yes	Effects of diamond nanoparticle exposure on the internal structure and reproduction of Daphnia magna	Journal of Hazardous Materials	2011	10.1016/j.jhazmat.2010.10.115
Aquatic	Freshwater	invertebrate	crustacean	gene expression	Ag nanowire	Yes	Silver Nanowire Exposure Results in Internalization and Toxicity to Daphnia magna	ACS Nano	2013	10.1021/nn4034103
Aquatic	Freshwater	invertebrate	crustacean	immobilization	Diamond NP	No	Combined toxicity of graphite-diamond nanoparticles and thiabendazole to Daphnia magna	Science of The Total Environment	2019	10.1016/j.scitotenv.2019.06.316
Aquatic	Freshwater	invertebrate	crustacean	growth, movement	Cu NPs	No	Conventional and nano-copper pesticides are equally toxic to the estuarine amphipod Leptocheirus plumulosus	Aquatic Toxicology	2020	10.1016/j.aquatox.2020.105481
Aquatic	Freshwater	invertebrate	crustacean	body lenght, reproduction rate	TiO2	No	Effects of TiO2 Nanoparticles on the Neotropical Cladoceran Ceriodaphnia silvestrii by Waterborne and Dietary Routes	Water, Air, & Soil Pollution volume	2018	10.1007/s11270-018-3964-1
Aquatic	Freshwater	invertebrate	crustacean	mortality, reproduction	Ag NPs	No	Toxicity of two types of silver nanoparticles to aquatic crustaceans Daphnia magna and Thamnocephalus platyurus	Environmental Science and Pollution Research	2013	10.1007/s11356-012-1290-5
Aquatic	Freshwater	invertebrate	crustacean	behaviour	Ag NPs	No	Gammarus fossarum (Crustacea, Amphipoda) as a model organism to study the effects of silver nanoparticles	Science of The Total Environment	2016	10.1016/j.scitotenv.2016.06.068
Aquatic	Freshwater	invertebrate	crustacean	survival, growth	Nanoclay	No	Converting natural nanoclay into modified nanoclay augments the toxic effect of natural nanoclay on aquatic invertebrates	Ecotoxicology and Environmental Safety	2020	10.1016/j.ecoenv.2020.110602
Aquatic	Freshwater	invertebrate	crustacean	immobilization	Colloidal goethite NPs	No	Acute ecotoxicity of coated colloidal goethite nanoparticles on Daphnia magna: Evaluating the influence of exposure approaches	Science of The Total Environment	2017	10.1016/j.scitotenv.2017.07.047
Aquatic	Freshwater	invertebrate	crustacean	mortality	ZnO NPs	Yes	Ecotoxicity of Musa paradisiaca leaf extract-coated ZnO nanoparticles to the freshwater microcrustacean Ceriodaphnia cornuta	Limnologica	2017	10.1016/j.limno.2017.09.004
Aquatic	Freshwater	invertebrate	crustacean	survival, oxidative stress	Polystyrene NPs	No	Age-dependent survival, stress defense, and AMPK in Daphnia pulex after short-term exposure to a polystyrene nanoplastic	Aquatic Toxicology	2018	10.1016/j.aquatox.2018.08.017
Aquatic	Freshwater	invertebrate	crustacean	gene expression	Polystyrene NPs	No	Molecular characterisation of cytochrome P450 enzymes in waterflea (Daphnia pulex) and their expression regulation by polystyrene nanoplastics	Aquatic Toxicology	2019	10.1016/j.aquatox.2019.105350
Aquatic	Freshwater	invertebrate	crustacean	dietary assimilation efficiency	CNT	Yes	Influences of ambient carbon nanotubes on toxic metals accumulation in Daphnia magna	Water Research	2013	10.1016/j.watres.2013.01.059
Aquatic	Freshwater	invertebrate	crustacean	immobilization	TiO2 NPs	No	Does the exposure mode to ENPs influence their toxicity to aquatic species? A case study with TiO2 nanoparticles and Daphnia magna	Environmental Science and Pollution Research	2015	10.1007/s11356-014-4005-2
Aquatic	Freshwater	invertebrate	crustacean	behaviour	CNT	Yes	Biological Uptake and Depuration of Carbon Nano-tubes by Daphnia magna	Environmental Science & Technology	2009	10.1021/es8029363
Aquatic	Freshwater	invertebrate	crustacean	immobilization	Ag and CuO NPs	No	Acute toxicity of Ag and CuO nanoparticle suspensions against Daphnia magna: The importance of their dissolved fraction varying with preparation methods	Journal of Hazardous Materials	2012	10.1016/j.jhazmat.2012.05.066
Aquatic	Freshwater	invertebrate	crustacean	immobilization	TiO2 NPs	No	Ecotoxicity of TiO2 to Daphnia similis under irradiation	Journal of Hazardous Materials	2012	10.1016/j.jhazmat.2011.12.075
Aquatic	Freshwater	invertebrate	crustacean	body stoichiometry	ZnO NPs	No	Stoichiometric responses to nano ZnO under warming are modified by thermal evolution in Daphnia magna	Aquatic Toxicology	2018	10.1016/j.aquatox.2018.07.005
Aquatic	Freshwater	invertebrate	crustacean	behaviour	C-60	Yes	Analysis of fullerene-C60 and kinetic measurements for its accumulation and depuration in Daphnia magna	Environmental Toxicology and Chemistry	2010	10.1002/etc.124
Aquatic	Freshwater	invertebrate	crustacean	feeding	CeO2 NPs, CNT	Yes	Bioaccumulation of silver nanoparticles into Daphnia magna from a freshwater algal diet and the impact of phosphate availability	Nanotoxicology	2014	10.3109/17435390.2013.778346
Aquatic	Freshwater	invertebrate	mollusc	survival, egg production	Ag NPs	No	Freshwater snail vital rates affected by non-lethal concentrations of silver nanoparticles	Hydrobiologia	2013	10.1007/s10750-013-1509-6
Aquatic	Freshwater	invertebrate	mollusc	predation	Ag NPs	No	Nanosilver Inhibits Freshwater Gastropod (Physa acuta) Ability to Assess Predation Risk	The American Midland Naturalist	2014	10.1674/0003-0031-171.2.340
Aquatic	Freshwater	invertebrate	mollusc	histological changes, inflammatory responses	Iron oxide NPs	No	Gonadal histopathology and inflammatory response in the freshwater snail exposed to iron oxide nanoparticles and ferric chloride: Insights into reproductive nanotoxicity	Aquatic Toxicology	2021	10.1016/j.aquatox.2021.105910
Aquatic	Freshwater	vertebrate	amphibian	mortality, growth, genotoxicity	CNT	No	Characterisation and in vivo ecotoxicity evaluation of double-wall carbon nanotubes in larvae of the amphibian Xenopus laevis	Aquatic Toxicology	2008	10.1016/j.aquatox.2008.01.011
Aquatic	Freshwater	vertebrate	amphibian	lethality, malformations, growth	carbon nanopowder	No	Does carbon nanopowder threaten amphibian development?	Carbon	2012	10.1016/j.carbon.2012.05.047
Aquatic	Freshwater	vertebrate	amphibian	survival	Pani NPs	No	The Chronic Toxicity of Pani-Nps to the Larvae Stage of Rhinella arenarum	Journal of Nanoscience and Nanotechnology	2016	10.1166/jnn.2016.12761
Aquatic	Freshwater	vertebrate	amphibian	viability, development	Polyaniline nanofibers	No	Polyaniline nanofibers: Acute toxicity and teratogenic effect on Rhinella arenarum embryos	Chemosphere	2012	10.1016/j.chemosphere.2012.02.033
Aquatic	Freshwater	vertebrate	amphibian	metamorphosis	GO	No	Graphene oxide and reduced graphene oxide promote the effects of exogenous T3 thyroid hormone in the amphibian Xenopus laevis	Chemosphere	2021	10.1016/j.chemosphere.2021.130901
Aquatic	Freshwater	vertebrate	amphibian	metamorphosis	Au NPs	No	Long-term exposure to gold nanoparticles accelerates larval metamorphosis without affecting mass in wood frogs (Lithobates sylvaticus) at environmentally relevant concentrations	Environmental Toxicology and Chemistry	2016	10.1002/etc.3396
Aquatic	Freshwater	vertebrate	fish	survival, enzyme activity	CNT	No	Carbon nanotube-based nanocarrier loaded with ribavirin against grass carp reovirus	Antiviral Research	2015	10.1016/j.antiviral.2015.03.006
Aquatic	Freshwater	vertebrate	fish	Heat Shock Proteins secretion	Ag NPs	No	A comparative study on biologically and chemically synthesized silver nanoparticles induced Heat Shock Proteins on fresh water fish Oreochromis niloticus	Chemosphere	2015	10.1016/j.chemosphere.2015.08.005
Aquatic	Freshwater	vertebrate	fish	mortality, hatching, heart rates, malformations, gene expression	Cu(OH)2 NPs	No	Developmental toxicity induced by Cu(OH)(2)nanopesticide in zebrafish embryos	Environmental Toxicology	2020	10.1002/tox.22993
Aquatic	Freshwater	vertebrate	fish	DNA damage, oxidative stress	Polystyrene NPs	No	Toxicity of polystyrene nanoplastics in Ctenopharyngodon idella juveniles: A genotoxic, mutagenic and cytotoxic perspective	Science of The Total Environment	2021	10.1016/j.scitotenv.2020.141937
Aquatic	Freshwater	vertebrate	fish	distrubution, clearance	Au NPs	Yes	Surface Properties Dictate Uptake, Distribution, Excretion, and Toxicity of Nanoparticles in Fish	Small	2010	10.1002/smll.201000989
Aquatic	Freshwater	vertebrate	fish	adsorption	Polystyrene NPs	Yes	Exploring uptake and biodistribution of polystyrene (nano)particles in zebrafish embryos at different developmental stages	Aquatic Toxicology	2017	10.1016/j.aquatox.2017.06.017
Aquatic	Freshwater	vertebrate	fish	mortality, behaviour	CNT	No	Ecotoxicological effects of carbofuran and oxidised multiwalled carbon nanotubes on the freshwater fish Nile tilapia: Nanotubes enhance pesticide ecotoxicity	Ecotoxicology and Environmental Safety	2015	10.1016/j.ecoenv.2014.10.005
Aquatic	Freshwater	vertebrate	fish	hatching, morphology changes, viability, behaviour, heart rate, inflammatory response	CNT	No	Biological response and developmental toxicity of zebrafish embryo and larvae exposed to multi-walled carbon nanotubes with different dimension	Heliyon	2019	10.1016/j.heliyon.2019.e02308
Aquatic	Freshwater	vertebrate	fish	metabolic activity, cell membrane integrity, lysosomal functioning	CNT, SiO2-NP, CeO2-NP,ZnO-NPs	No	Fish cell lines as a tool for the ecotoxicity assessment and ranking of engineered nanomaterials	Regulatory Toxicology and Pharmacology	2017	10.1016/j.yrtph.2017.09.029
Aquatic	Freshwater	vertebrate	fish	histological changes, lipid peroxidation	Carbon NMs	No	Intravenous injection of unfunctionalized carbon-based nanomaterials confirms the minimal toxicity observed in aqueous and dietary exposures in juvenile rainbow trout (Oncorhynchus mykiss)	Environmental Pollution	2018	10.1016/j.envpol.2017.09.033
Aquatic	Freshwater	vertebrate	fish	oxidative stress	Polystyrene NPs	No	Effects of polystyrene nanoplastics on Ctenopharyngodon idella (grass carp) after individual and combined exposure with zinc oxide nanoparticles	Journal of Hazardous Materials	2021	10.1016/j.jhazmat.2020.123879
Aquatic	Freshwater	vertebrate	fish	hatching rate	TiO2 NPs	Yes	Adsorption characteristics of nano-TiO2 onto zebrafish embryos and its impacts on egg hatching	Chemosphere	2016	10.1016/j.chemosphere.2016.03.061
Aquatic	Freshwater	vertebrate	fish	histological changes	Ag NPs	No	Histopathological effects of waterborne silver nanoparticles and silver salt on the gills and liver of goldfish Carassius auratus	International Journal of Environmental Science and Technology	2016	10.1007/s13762-016-0972-9
Aquatic	Freshwater	vertebrate	fish	histological changes	CNT	No	Histopathological alterations in the gills of Nile tilapia exposed to carbofuran and multiwalled carbon nanotubes	Ecotoxicology and Environmental Safety	2016	10.1016/j.ecoenv.2016.07.041
Aquatic	Freshwater	vertebrate	fish	changes in enzyme activities	TiO2 NPs	No	Effects of humic acid and ionic strength on TiO2 nanoparticles sublethal toxicity to zebrafish	Ecotoxicology	2015	10.1007/s10646-015-1541-6
Aquatic	Freshwater	vertebrate	fish	cell viability, ROS production, lipid damage	C-60 nanomaterial	No	In vitro evaluation of co-exposure of arsenium and an organic nanomaterial (fullerene, C-60) in zebrafish hepatocytes	Comparative Biochemistry and Physiology Part C: Toxicology & Pharmacology	2012	10.1016/j.cbpc.2011.08.005
Aquatic	Freshwater	vertebrate	fish	mortality, enzyme activities	Ag	No	Toxicity comparison of colloidal silver nanoparticles in various life stages of rainbow trout (Oncorhynchus mykiss)	Iranian Journal of Fisheries Sciences	2013
Aquatic	Freshwater	vertebrate	fish	lipid peroxides, enzyme activity	TiO2	No	Fish Exposure to Sub-Lethal Toxicity of Nano-Titanium Oxide and Changes in Muscular Antioxidant Enzymes and Protective Role of Vitamins C and E in Clarias gariepinus	International Journal of Agriculture and Biology	2017	10.17957/IJAB/15.0454
Aquatic	Freshwater	vertebrate	fish	genotoxicity, cytotoxicity	TiO2 NPs	No	Genotoxicity assessment of TiO2 nanoparticles in the teleost Danio rerio	Ecotoxicology and Environmental Safety	2015	10.1016/j.ecoenv.2014.12.012
Aquatic	Freshwater	vertebrate	fish	locomotor activity	TiO2 NPs	No	Subtle alterations in swimming speed distributions of rainbow trout exposed to titanium dioxide nanoparticles are associated with gill rather than brain injury		2013	10.1016/j.aquatox.2012.10.006
Aquatic	Freshwater	vertebrate	fish	enzyme activity, genotoxicity	Au	No	Effects of single and combined exposures of gold (nano versus ionic form) and gemfibrozil in a liver organ culture of Sparus aurata	Marine Pollution Bulletin	2020	10.1016/j.marpolbul.2020.111665
Aquatic	Freshwater	vertebrate	fish	growth, histopathological changes	Ag NPs	No	Impact of aqueous exposure to silver nanoparticles on growth performance, redox status, non-specific immunity, and histopathological changes of Nile Tilapia, Oreochromis niloticus, challenged with Aeromonas hydrophila	Aquaculture Reports	2021	10.1016/j.aqrep.2021.100816
Aquatic	Freshwater	vertebrate	fish	oxidative stress, histological changes	CeO2	No	Effects of of the chronic exposure to cerium dioxide nanoparticles in Oncorhynchus mykiss: Assessment of oxidative stress, neurotoxicity and histological alterations	Environmental Toxicology and Pharmacology	2019	10.1016/j.etap.2019.02.012
Aquatic	Freshwater	vertebrate	fish	oxidative stress	CNT	No	Influence of multi-walled carbon nanotubes on enantioselective bioaccumulation and oxidative stress toxicity of indoxacarb in zebrafish(Danio rerio)	Chemosphere	2021	10.1016/j.chemosphere.2020.128872
Aquatic	Freshwater	vertebrate	fish	locomotion activity	Ag NPs	No	Behavioural toxicity assessment of silver ions and nanoparticles on zebrafish using a locomotion profiling approach	Aquatic Toxicology	2016	10.1016/j.aquatox.2016.01.013
Aquatic	Freshwater	vertebrate	fish	survival, hatching rate, heartbeat	C-60 nanomaterial	No	Developmental toxicity in zebrafish (Danio rerio) embryos after exposure to manufactured nanomaterials: Buckminsterfullerene aggregates (nC(60)) and fullerol	Environmental Toxicology and Chemistry	2007	10.1897/06-583.1
Aquatic	Freshwater	vertebrate	fish	genotoxicity	CuO NPs	No	Co-exposure of iron oxide nanoparticles and glyphosate-based herbicide induces DNA damage and mutagenic effects in the guppy (Poecilia reticulata)	Environmental Toxicology and Pharmacology	2021	10.1016/j.etap.2020.103521
Aquatic	Freshwater	vertebrate	fish	Oxidative stress , lipid peroxidation , Na+/K+-ATPase activity, genotoxicity, histopathology	CeO2	No	Multi-biomarker approach to assess the acute effects of cerium dioxide nanoparticles in gills, liver and kidney of Oncorhynchus mykiss	Comparative Biochemistry and Physiology - Part C: Toxicology & Pharmacology	2020	10.1016/j.cbpc.2020.108842
Aquatic	Freshwater	vertebrate	fish	redox state, lipid peroxidation	C-60	No	In vitro exposure to fullerene C60 influences redox state and lipid peroxidation in brain and gills from Cyprinus carpio (Cyprinidae)	Environmental Toxicology and Chemistry	2012	10.1002/etc.1792
Aquatic	Freshwater	vertebrate	fish	genotoxicity, histopathology	Magnetic vermiculite	No	Genotoxic and histopathological biomarkers for assessing the effects of magnetic exfoliated vermiculite and exfoliated vermiculite in Danio rerio	Science of The Total Environment	2016	10.1016/j.scitotenv.2016.01.048
Aquatic	Freshwater	vertebrate	fish	haematological and histopathological changes, oxidative stress	Ag, CuO	No	Genetic and systemic toxicity induced by silver and copper oxide nanoparticles, and their mixture in Clarias gariepinus (Burchell, 1822)	Environmental Science and Pollution Research	2019	10.1007/s11356-019-05958-6
Aquatic	Freshwater	vertebrate	fish	oxidative stress, histological changes	TiO2 NPs	No	Liver Alterations in Two Freshwater Fish Species (Carassius auratus and Danio rerio) Following Exposure to Different TiO2 Nanoparticle Concentrations	Microscopy and Microanalysis	2013	10.1017/S1431927613013238
Aquatic	Freshwater	vertebrate	fish	hatching, survival, development, ROS production, oxidative stress	Polystyrene NPs	No	Effects of nanoplastic on toxicity of azole fungicides (ketoconazole and fluconazole) in zebrafish embryos	Science of The Total Environment	2021	10.1016/j.scitotenv.2021.149463
Aquatic	Freshwater	vertebrate	fish cell	cell viability	graphene	No	Usefulness of fish cell lines for the initial characterization of toxicity and cellular fate of graphene-related materials (carbon nanofibers and graphene oxide)	Chemosphere	2019	10.1016/j.chemosphere.2018.11.130
Aquatic	Freshwater	vertebrate	fish	enzyme and non enzyme activity	ZnO NPs	No	Oxidative stress responses in different organs of carp (Cyprinus carpio) with exposure to ZnO nanoparticles	Ecotoxicology and Environmental Safety	2012	10.1016/j.ecoenv.2012.02.017
Aquatic	Freshwater	vertebrate	fish	haematology, enzyme activity, histopathology	TiO2 NPs	No	Sub-lethal effects of titanium dioxide nanoparticles on the physiology and reproduction of zebrafish	Aquatic Toxicology	2013	10.1016/j.aquatox.2012.08.021
Aquatic	Freshwater	vertebrate	fish	oxidative stress	CNT	No	Hepatic oxidative stress and catalyst metals accumulation in goldfish exposed to carbon nanotubes under different pH levels	Aquatic Toxicology	2015	10.1016/j.aquatox.2015.01.015
Aquatic	Freshwater	vertebrate	fish	behaviour	ZnO NPs	No	Analysis of ZnO nanoparticle-induced changes in Oreochromis niloticus behavior as toxicity endpoint	Science of The Total Environment	2019	10.1016/j.scitotenv.2019.05.183
Aquatic	Freshwater	vertebrate	fish cells	biological identity	CNT	No	Female versus male biological identities of nanoparticles determine the interaction with immune cells in fish	Environmental Science Nano	2017	10.1039/c7en00071e
Aquatic	Freshwater	vertebrate	fish	hematological and oxidative stress	Co and Fe from citric-acid-adsorbed CoFe2O4 NPs	Yes	An Investigation on Freshwater Fish Oreochromis niloticus (Linnaeus, 1758): Assessing Hemotoxic Effects of Different Copper Compounds Used as Nanomaterial or Pesticide	Bulletin of Environmental Contamination and Toxicology	2021	10.1007/s00128-021-03320-6
Aquatic	Freshwater	vertebrate	fish	oxidative stress	Ag NPs	Yes	Biomarker Evaluation in Fish After Prolonged Exposure to Nano-TiO2: Influence of Illumination Conditions and Crystal Phase	Journal of Nanoscience and Nanotechnology	2015	10.1166/jnn.2015.10021
Aquatic	Freshwater	invertebrates	rotifer	growth, oxidative stress	Ag and Cu NPs	No	Effects of metal nanoparticles on freshwater rotifers may persist across generations	Aquatic Toxicology	2020	10.1016/j.aquatox.2020.105652
Aquatic	Freshwater	invertebrate, bacteria	cteria, crustacean	growth, oxidative stress	CeO2 NPs	No	Natural molecule coatings modify the fate of cerium dioxide nanoparticles in water and their ecotoxicity to Daphnia magna	Environmental Pollution	2020	10.1016/j.envpol.2019.113597
Aquatic	Freshwater	algae, invertebrates, vertebrates	algae, crustacean, fish	growth, immobilization	Ag NPs	No	Aquatic toxicity of nanosilver colloids to different trophic organisms: Contributions of particles and free silver ion	Environmental Toxicology and Chemistry	2012	10.1002/etc.1964
Aquatic	Freshwater	algae, invertebrates	algae, crustacean	growth, immobilization	La2O3 NPs	No	Toxicity of lanthanum oxide (La2O3) nanoparticles in aquatic environments	Environmental Science: Processes & Impacts	2015	10.1039/c5em00035a
Aquatic	Freshwater	bacteria, algae, invertebrates, vertebrates	crustacean, fish, algae, bacteria	mortality, immobility	Iron nanomaterial	No	The ecotoxic potential of a new zero-valent iron nanomaterial, designed for the elimination of halogenated pollutants, and its effect on reductive dechlorinating microbial communities	Environmental Pollution	2016	10.1016/j.envpol.2016.05.051
Aquatic	Freshwater	bacteria, fungi, algae,invertebrates, vertebrates	trophic chain	biomass, morphology	CeO2 NPs	No	Toxicity of CeO2 nanoparticles on a freshwater experimental trophic chain: A study in environmentally relevant conditions through the use of mesocosms	Nanotoxicology	2016	10.3109/17435390.2015.1053422
Aquatic	Freshwater	bacteria, algae, invertebrates	crustacean, algae, bacteria	bioluminescence, growth	Silica and polystyrene NPs	No	Ecotoxicological assessment of silica and polystyrene nanoparticles assessed by a multitrophic test battery	Environmental International	2013	10.1016/j.envint.2012.11.001
Aquatic	Freshwater	algae, invertebrates	algae, crustacean	growth, immobilization	TiO2 NPs	No	Ecotoxic effect of photocatalytic active nanoparticles TiO2 on algae and daphnids	Environmental Science and Pollution Research	2006	10.1065/espr2006.06.311
Aquatic	Freshwater	bacteria, algae, invertebrates, vertebrates	bacteria,algae, crustacean, fish	surviva, histology, enzyme activity	TiO2 NPs	No	A multi-integrated approach on toxicity effects of engineered TiO2 nanoparticles	Frontiers of Environmental Science & Engineering	2015	10.1007/s11783-015-0775-0
Aquatic	Freshwater	algae, invertebrates	algae, crustacean	growth, immobilization	C-60	Yes	Toxicity and bioaccumulation of xenobiotic organic compounds in the presence of aqueous suspensions of aggregates of nano-C-60	Aquatic Toxicology	2008	10.1016/j.aquatox.2007.11.019
Aquatic	Freshwater	algae, invertebrates	algae, shrimp	growth inhibition, enzyme activity	GO	No	Addressing challenges in providing a reliable ecotoxicology data for graphene-oxide (GO) using an algae (Raphidocelis subcapitata), and the trophic transfer consequence of GO-algae aggregates	Chemosphere	2020	10.1016/j.chemosphere.2019.125640
Aquatic	Freshwater	invertebrates, vertebrates	crustacean,fish	survival	TiO2 and graphene-TiO2 NPs	No	Comparison of TiO2 nanoparticle and graphene-TiO2 nanoparticle composite phototoxicity to Daphnia magna and Oryzias latipes	Chemosphere	2014	10.1016/j.chemosphere.2014.03.058
Aquatic	Freshwater	bacteria, invertebrates	bacteria, crustacean	growth, enzyme activity, pulse-amplitude modulation	TiO2, ZrO2, Al2O3, CeO, C-60 NPs, carbon nanotubes	No	Aquatic ecotoxicity tests of some nanomaterials	Environmental Toxicology and Chemistry	2008	10.1897/07-509.1
Aquatic	Freshwater	bacteria, vertebrates	bacteria, amphibian	bioluminescence inhibition, mortality	Gamma-Al2O3 and Ni/gamma-Al2O3 NMs	No	Monitoring the ecotoxicity of gamma-Al2O3 and Ni/gamma-Al2O3 nanomaterials by means of a battery of bioassays	Ecotoxicology and Environmental Safety	2017	10.1016/j.ecoenv.2017.06.029
Aquatic	Freshwater	invertebrates	mollusks, crustaceans	enzyme activity	CeO2 NPs	No	Multibiomarker assessment of cerium dioxide nanoparticle (nCeO(2)) sublethal effects on two freshwater invertebrates, Dreissena polymorpha and Gammarus roeseli	Aquatic Toxicology	2015	10.1016/j.aquatox.2014.11.004
Aquatic	Seawater	bacteria	bacteria	culturability inhibition	CuO NPs	No	Salinity-Based Toxicity of CuO Nanoparticles, CuO-Bulk and Cu Ion to Vibrio anguillarum	Frontiers in Microbiology	2017	10.3389/fmicb.2017.02076
Aquatic	Seawater	bacteria	bacteria	cell density	CeO2 NPs	No	Investigating the Impact of Cerium Oxide Nanoparticles Upon the Ecologically Significant Marine Cyanobacterium Prochlorococcus	Frontiers in Marine Science	2021	10.3389/fmars.2021.668097
Aquatic	Seawater	bacteria	biofilm	development, biofilm formation	Ag NPs	Yes	Impact of silver nanoparticles on natural marine biofilm bacteria	Chemosphere	2011	10.1016/j.chemosphere.2011.06.066
Aquatic	Seawater	algae	algae	cell integrity, cell density	Polystyrene NPs	No	Behavior of tetracycline and polystyrene nanoparticles in estuaries and their joint toxicity on marine microalgae Skeletonema costatum	Environmental Pollution	2020	10.1016/j.envpol.2020.114453
Aquatic	Seawater	algae	algae	growth inhibition, enzyme activity, lipid peroxidation	ZnO NPs	No	Contributions of Zn Ions to ZnO Nanoparticle Toxicity on Microcystis aeruginosa During Chronic Exposure	Bulletin of Environmental Contamination and Toxicology	2019	10.1007/s00128-019-02725-8
Aquatic	Seawater	algae	algae	growth, ROS production, lipid peroxidation	ZnO NPs	No	Plain polystyrene microplastics reduce the toxic effects of ZnO particles on marine microalgae Dunaliella salina	Journal of Environmental Chemical Engineering	2020	10.1016/j.jece.2020.104250
Aquatic	Seawater	algae	algae	growth	SiO2 NPs, TiO2 NPs	No	The diverse toxic effect of SiO2 and TiO2 nanoparticles toward the marine microalgae Dunaliella tertiolecta	Environmental Science and Pollution Research	2015	10.1007/s11356-015-4790-2
Aquatic	Seawater	invertebrates	mollusc	cell viability, morphological changes	CNT, CNF, silicon nanotubes, Au, TiO2	No	Toxicity of Carbon, Silicon, and Metal-Based Nanoparticles to the Hemocytes of Three Marine Bivalves	Animals	2020	10.3390/ani10050827
Aquatic	Seawater	invertebrates	mollusc	enzyme activity	TiO2 NPs	No	Nano-TiO2 impairs digestive enzyme activities of marine mussels under ocean acidification	Chemosphere	2019	10.1016/j.chemosphere.2019.124561
Aquatic	Seawater	invertebrates	mollusc	developmental anomalies	TiO2 NPs	No	Embryotoxicity of TiO2 nanoparticles to Mytilus galloprovincialis (Lmk)	Marine Environmental Research	2013	10.1016/j.marenvres.2013.08.015
Aquatic	Seawater	invertebrates	mollusc	oxidative stress, enzyme activity	CNT	No	Tissue specific responses to cadmium-based quantum dots in the marine mussel Mytilus galloprovincialis	Aquatic Toxicology	2015	10.1016/j.aquatox.2015.10.001
Aquatic	Seawater	invertebrates	mollusc	growth	CuO NPs	Yes	Accumulation and Toxicity of Copper Oxide Engineered Nanoparticles in a Marine Mussel	Nanomaterials	2014	10.3390/nano4030535
Aquatic	Seawater	invertebrates	mollusc	immunocytotoxicity, cytogenotoxicity, genotoxicity	Cd-based quantum dots	No	Immunocytotoxicity, cytogenotoxicity and genotoxicity of cadmium-based quantum dots in the marine mussel Mytilus galloprovincialis	Marine Environmental Research	2014	10.1016/j.marenvres.2014.07.009
Aquatic	Seawater	invertebrates	mollusc	biomarkers of immune response, oxidative stress response, lysosomal destabilisation and genotoxic damage	Polystyrene	Yes	Microplastics, microfibres and nanoplastics cause variable sub-lethal responses in mussels (Mytilus spp.)	Marine Pollution Bulletin	2020	10.1016/j.marpolbul.2020.111552
Aquatic	Seawater	invertebrates	mollusc	ROS production, cellular damage	CNT	No	Does salinity variation increase synergistic effects of triclosan and carbon nanotubes on Mytilus galloprovincialis? Responses on adult tissues and sperms	Science of The Total Environment	2020	10.1016/j.scitotenv.2020.138837
Aquatic	Seawater	invertebrates	mollusc	oxidative stress, gene expression	Graphene	No	Toxicological effects of graphene on mussel Mytilus galloprovincialis hemocytes after individual and combined exposure with triphenyl phosphate	Marine Pollution Bulletin	2020	10.1016/j.marpolbul.2019.110838
Aquatic	Seawater	invertebrates	mollusc	enzymatic and non-enzymatic antioxidant activity, oxidative damage, DNA damage	ZnO NPs	No	ZnO nanoparticles alter redox metabolism of Limnoperna fortunei	Environmental Science and Pollution Research	2021	10.1007/s11356-021-15257-8
Aquatic	Seawater	invertebrates	mollusc	enzyme activity	Ag NPs	No	Toxicity of silver nanoparticles on the clam Ruditapes decussatus assessed through biomarkers and clearance rate( * )	Materials Research Express	2021	10.1088/2053-1591/ac2c2f
Aquatic	Seawater	invertebrates	mollusc	oxidative stress	Graphene oxide NPs	No	Oxidative stress in Ruditapes philippinarum after exposure to different graphene oxide concentrations in the presence and absence of sediment	Comparative Biochemistry and Physiology - Part C: Toxicology & Pharmacology	2021	10.1016/j.cbpc.2020.108922
Aquatic	Seawater	invertebrates	mollusc	enzyme activity	Au NPs	No	Gold Octahedra nanoparticles (Au_(0.03) and Au_(0.045)): Synthesis and impact on marine clams Ruditapes decussatus	Aquatic Toxicology	2018	10.1016/j.aquatox.2018.07.004
Aquatic	Seawater	invertebrates	mollusc	biochemical performance	Carbon NPs	No	The impacts of emergent pollutants on Ruditapes philippinarum: biochemical responses to carbon nanoparticles exposure	Aquatic Toxicology	2017	10.1016/j.aquatox.2017.03.010
Aquatic	Seawater	invertebrates	crustacean	swimming behaviour	Ag NPs	No	Behavioural effects on marine amphipods exposed to silver ions and silver nanoparticles	Environmental Pollution	2019	10.1016/j.envpol.2019.06.005
Aquatic	Seawater	invertebrates	crustacean	mortality, gene expression	ZnO NPs	No	Sunscreens containing zinc oxide nanoparticles can trigger oxidative stress and toxicity to the marine copepod Tigriopus japonicus	Marine Pollution Bulletin	2020	10.1016/j.marpolbul.2020.111078
Aquatic	Seawater	invertebrates	crustacean	gene expression, transcriptome	SiO2 NPs	No	De novo transcriptome assembly and differential gene expression analysis of the calanoid copepod Acartia tonsa exposed to nickel for nanoparticles	Chemosphere	2018	10.1016/j.chemosphere.2018.06.096
Aquatic	Seawater	invertebrates	coral	fertilization, larval development	Ag nanocolloids	No	Effects of silver nanocolloids on early life stages of the scleractinian coral Acropora japonica	Marine Environmental Research	2014	10.1016/j.marenvres.2014.06.010
Aquatic	Seawater	invertebrates	anellid	developmental responses	CNT	No	Atlantic and Mediterranean populations of the widespread serpulid Ficopomatus enigmaticus: Developmental responses to carbon nanotubes	Marine Pollution Bulletin	2020	10.1016/j.marpolbul.2020.111265
Aquatic	Seawater	invertebrates	anellid	enzyme activity	CdS quantum dots	No	Biochemical and behavioural responses of the marine polychaete Hediste diversicolor to cadmium sulfide quantum dots (CdS QDs): Waterborne and dietary exposure	Chemosphere	2014	10.1016/j.chemosphere.2013.12.069
Aquatic	Seawater	invertebrates	anellid	mortality, DNA damage	TiO2 NPs, CNT	No	Sublethal toxicity of nano-titanium dioxide and carbon nanotubes in a sediment dwelling marine polychaete	Environmental Pollution	2010	10.1016/j.envpol.2009.11.013
Aquatic	Seawater	invertebrates	echinoderm	development	TiO2 NPs, CeO2 NPs	No	Metal oxide nanomaterials in seawater: Linking physicochemical characteristics with biological response in sea urchin development	Journal of Hazardous Materials	2011	10.1016/j.jhazmat.2011.06.080
Aquatic	Seawater	invertebrates	echinoderm	sperm activity, fertilization, development	CNT, CNF, silicon nanotubes, nanocrystals of CdS and ZnS, Au, TiO2	No	Toxicity of Carbon, Silicon, and Metal-Based Nanoparticles to Sea Urchin Strongylocentrotus intermedius	Nanomaterials	2020	10.3390/nano10091825
Aquatic	Seawater	invertebrates	echinoderm	fertilization, development, morphological anomalies	Si NPs	No	Multidisciplinary screening of toxicity induced by silica nanoparticles during sea urchin development	Chemosphere	2015	10.1016/j.chemosphere.2015.07.072
Aquatic	Seawater	invertebrates	rotifer	feeding, reproductive behaviour, offspring fitness	n.a.	No	Assessing Toxicity of Nanoparticles Using Brachionus manjavacas (Rotifera)	Environmental Toxicology	2011	10.1002/tox.20538
Aquatic	Seawater	invertebrates	rotifer	mortality	Polystyrene NPs	No	Comparative ecotoxicity of polystyrene nanoparticles in natural seawater and reconstituted seawater using the rotifer Brachionus plicatilis	Ecotoxicology and Environmental Safety	2017	10.1016/j.ecoenv.2017.07.068
Aquatic	Seawater	vertebrates	fish	gene expression	Au NPs	No	Modulation of immune genes mRNA levels in mucosal tissues and DNA damage in red blood cells of Sparus aurata by gold nanoparticles	Marine Pollution Bulletin	2018	10.1016/j.marpolbul.2018.06.007
Aquatic	Seawater	invertebrate	mollusk, anellid	physiological functions, antioxidant system	Nanohorn	No	A preliminary investigation on nanohorn toxicity in marine mussels and polychaetes	Science of The Total Environment	2014	10.1016/j.scitotenv.2013.08.020
Aquatic	Seawater	algae, invertebrate	algae, crustacean	mortality	TiO2 NPs	No	Potential effects of TiO2 nanoparticles and TiCl4 in saltwater to Phaeodactylum tricornutum and Artemia franciscana	Science of The Total Environment	2017	10.1016/j.scitotenv.2016.11.135
Aquatic	Seawater	bacteria, algae, invertebrate	algae, bacteria, crustacean	bioluminescent inhibition, growth, mortality	ZnO NPs	No	Testing ZnO nanoparticle ecotoxicity: linking time variable exposure to effects on different marine model organisms	Environmental Science and Pollution Research	2018	10.1007/s11356-017-0815-3
Aquatic	Seawater	algae, invertebrate	rotifers, algae	mortality, growth	PMMA NPs	No	The effects of nanoplastics on marine plankton: A case study with polymethylmethacrylate	Ecotoxicology and Environmental Safety	2019	10.1016/j.ecoenv.2019.109632
Aquatic	Seawater	bacteria, algae, invertebrate	bacteria, algae, anellid	bioluminescent inhibition, growth, development	ZnO NPs, TiO2 NPs	No	Ecotoxicological screening of UV-filters using a battery of marine bioassays	Environmental Pollution	2021	10.1016/j.envpol.2021.118011
Aquatic	Seawater	algae, invertebrate	algae, crustacean	growth, mortality	Polystyrene NPs	No	Long-term toxicity of surface-charged polystyrene nanoplastics to marine planktonic species Dunaliella tertiolecta and Artemia franciscana	Aquatic Toxicology	2017	10.1016/j.aquatox.2017.06.008
Aquatic	Comparative	algae	microalgae	growth, chlorphyll content	TiO2 NPs, ZnO NPs	No	Ecotoxicological effects of new generation pollutants (nanoparticles, amoxicillin and white musk) on freshwater and marine phytoplankton species	Chemosphere	2021	10.1016/j.chemosphere.2021.130623
Aquatic	Comparative	bacteria, algae, invertebrate	crustacean, bacteria, algae	immobilization, bioluminescent activity, growth	Aminoclays NPs	No	Aquatic ecotoxicity effect of engineered aminoclay nanoparticles	Ecotoxicology and Environmental Safety	2014	10.1016/j.ecoenv.2014.01.005
Aquatic	Comparative	bacteria, invertebrate	crustacean, bacteria	immobilization, bioluminescent activity	Se NPs	No	Stability and toxicity of differently coated selenium nanoparticles under model environmental exposure settings	Chemosphere	2020	10.1016/j.chemosphere.2020.126265
Aquatic	Comparative	algae	microalgae	growth, photosynthesis	CeO2 NPs	No	Effect of erythromycin and modulating effect of CeO2 NPs on the toxicity exerted by the antibiotic on the microalgae Chlamydomonas reinhardtii and Phaeodactylum tricomutum		2018	10.1016/j.envpol.2018.07.009
