# Supplementary material for: Nanomaterial Ecotoxicology in the Terrestrial and Aquatic Environment: A Systematic Review
Source: MDPI journal article supplement (doi:10.3390/toxics10070393), 2022-07-14
Supplement: s1 [file Gambardella & Pinsino_Table S2.xlsx]

## Sheet: Suppl. Mat. 2_Terrestrial
Environment	Compartment	Target organism	Organism	Nanomaterial	Target	Uptake/accumulation	Article Title	Journal	Published year	DOI
Terrestrial	Soil	bacteria	microbiome	TiO2 NPs	gene expression	No	Wastewater Treatment Processing of Silver Nanoparticles Strongly Influences Their Effects on Soil Microbial Diversity	Environmental Science and Technology	2020	10.1021/acs.est.0c01312
Terrestrial	Soil	bacteria	microbiome	CuO NPs	gene expression	No	Long-Term Effects of Copper Nanopesticides on Soil and Sediment Community Diversity in Two Outdoor Mesocosm Experiments	Environmental Science and Technologies	2020	10.1021/acs.est.0c00510
Terrestrial	Soil	bacteria	microbiome	Ag, Al2O3, SiO2 NPs	enzyme analysis, molecular fingerprinting, amplicon sequencing	No	Soil microbial community responses to contamination with silver, aluminium oxide and silicon dioxide nanoparticles	Ecotoxicology	2017	10.1007/s10646-017-1776-5
Terrestrial	Soil	bacteria	microbiome	Ag NPs	metabolism	No	Influence of soil properties on the effect of silver nanomaterials on microbial activity in five soils	Environmental Pollution	2015	10.1016/j.envpol.2014.10.021
Terrestrial	Soil	bacteria	microbiome	CNT	growth, gene expression	No	Effects of carbon nanotubes on atrazine biodegradation by Arthrobacter sp.	JOURNAL OF HAZARDOUS MATERIALS	2015	10.1016/j.jhazmat.2015.01.039
Terrestrial	Soil	bacteria	microbial activities	CuO NPs	metabolism	No	Negative Effects of Copper Oxide Nanoparticles on Carbon and Nitrogen Cycle Microbial Activities in Contrasting Agricultural Soils and in Presence of Plants	Frontiers in Microbiology	2018	10.3389/fmicb.2018.03102
Terrestrial	Soil	bacteria	bacteria	TiO2 NPs	cell damage, oxidative stress, metabolomics, transcriptomics	No	Pentachlorophenol and ciprofloxacin present dissimilar joint toxicities with carbon nanotubes to Bacillus subtilis	Environmental Pollution	2021	10.1016/j.envpol.2020.116071
Terrestrial	Soil	bacteria	microbiome	ZnO NPs	gene expression	No	Impact of biosolids, ZnO, ZnO/biosolids on bacterial community and enantioselective transformation of racemic-quizalofop-ethyl in agricultural soil	Journal of Environmental Sciences	2020	10.1016/j.jes.2019.06.012
Terrestrial	Air	bacteria	antimicrobial activity	Polyethylenimine NPs	photodynamic inactivation, ROS production	Yes	Enhanced photodynamic inactivation for Gram-negative bacteria by branched polyethylenimine-containing nanoparticles under visible light irradiation	Journal of colloid and interface science	2021	10.1016/j.jcis.2020.09.106
Terrestrial	Soil	bacteria	microbiome	Ag NPs	growth, metabolism	No	Effects of engineered silver nanoparticles on the growth and activity of ecologically important microbes	Environmental Microbiology Reports	2014	10.1111/1758-2229.12147
Terrestrial	Soil	bacteria	microbiome	CeO2, Fe3O4, SnO2 NPs	metabolism	No	Toxicity of metal oxide (CeO2, Fe3O4, SnO2) engineered nanoparticles on soil microbial biomass and their distribution in soil	Soil Biology & Biochemistry	2013	10.1016/j.soilbio.2013.01.016
Terrestrial	Soil	bacteria	microbiome	ZnO NPs	Microbial biomass carbon activity	No	Zinc oxide nanoparticles affect carbon and nitrogen mineralization of Phoenix dactylifera leaf litter in a sandy soil	Journal of Hazardous Materials	2017	10.1016/j.jhazmat.2016.10.063
Terrestrial	Soil	bacteria	microbiome	Polystyrene NPs	microbioma	No	Effect of nanoplastics on the transport of platinum-based pharmaceuticals in water-saturated natural soil and their effect on a soil microbial community	Environmental Science-Nano	2020	10.1039/d0en00651c
Terrestrial	Soil	bacteria	microbiome	Ag NPs	metabolism	No	Long-term effects of sulfidized silver nanoparticles in sewage sludge on soil microflora	Environmental Toxicology and Chemistry	2017	10.1002/etc.3904
Terrestrial	Soil	bacteria	microbiome	Ag NPs	respiration, enzyme activity	No	Evaluation of microbial shifts caused by a silver nanomaterial: comparison of four test systems	Environmental Science Europe	2019	10.1186/s12302-019-0268-z
Terrestrial	Soil	bacteria	microbiome	TiO2 and ZnO NPs	biomass	No	Impact of TiO2 and ZnO Nanoparticles on Soil Bacteria and the Enantioselective Transformation of Racemic-Metalaxyl in Agricultural Soil with Lolium perenne: A Wild Greenhouse Cultivation	Journal of Agricultural and Food Chemistry	2020	10.1021/acs.jafc.0c03959
Terrestrial	Soil	bacteria	microbiome	TiO2 NPs	abundance, carbon mineralization activity	No	Influence of soil properties on the toxicity of TiO2 nanoparticles on carbon mineralization and bacterial abundance	Journal of Hazardous Materials	2015	10.1016/j.jhazmat.2014.10.004
Terrestrial	Soil	bacteria	microbiome	TiO2 NPs	gene expression	No	Nano-Titanium Dioxide Exposure Impacts Nitrogen Metabolism Pathways in Cyanobacteria	Environmental Engineering Science	2021	10.1089/ees.2020.0150
Terrestrial	Soil	bacteria	microbiome	Cu and ZnO NPs	growth	No	Comparative Toxicity of Nanoparticulate CuO and ZnO to Soil Bacterial Communities	Plos One	2012	10.1371/journal.pone.0034197
Terrestrial	Air	fungi	fungi	Ag NPs	growth	No	Physiological effects of nanosilver on vegetative mycelium, conidia and the development of the entomopathogenic fungus, Isaria fumosorosea	Biocontrol Science and Technologies	2015	10.1080/09583157.2015.1020284
Terrestrial	Soil	plant	plant	ZnO and CeO2 NPs	growth, photosinthesis	No	The Combined Effect of ZnO and CeO2 Nanoparticles on Pisum sativum L.: A Photosynthesis and Nutrients Uptake Study	Cells	2021	10.3390/cells10113105
Terrestrial	Soil	plant	plant	NiO NPs	transport capability	Yes	Impact of multiwall carbon nanotubes on the accumulation and distribution of carbamazepine in collard greens (Brassica oleracea)	Environmental Science Nano	2017	10.1039/c6en00419a
Terrestrial	Soil	plant	plant	NiO NPs	potosynthesis, oxidative stress	No	Ecotoxicological relevance of nano-NiO and acetaminophen to Hordeum vulgare L.: Combining standardized procedures and physiological endpoints	Chemosphere	2016	10.1016/j.chemosphere.2016.09.053
Terrestrial	Soil	plant	plant	C-60 NPs	growth	Yes	Fullerene-Enhanced Accumulation of p,p '-DDE in Agricultural Crop Species	Environmental Science and Technologies	2012	10.1021/es301982w
Terrestrial	Soil	plant	plant	TiO2 NPs	growth, photosinthesis, phytochelatins levels	No	Environmental impact of sunscreen nanomaterials: Ecotoxicity and genotoxicity of altered TiO2 nanocomposites on Vicia faba	Environmental Pollution	2011	10.1016/j.envpol.2011.06.020
Terrestrial	Soil	plant	plant	Carbon nanotubes, Ag, Cu, ZnO and Si NPs	germination, elongation, biomass, transpiration	No	Assay-Dependent Phytotoxicity of Nanoparticles to Plants	Environmental Science and Technologies	2009	10.1021/es901695c
Terrestrial	Soil	plant	plant	Ag and CeO2 NPs	germination, elongation, gene expression	Yes	Co-exposure of imidacloprid and nanoparticle Ag or CeO2 to Cucurbita pepo (zucchini): Contaminant bioaccumulation and translocation	Nano Impact	2018	10.1016/j.impact.2018.07.001
Terrestrial	Soil	plant	plant	Ag and Cu NPs	growth, transpiration	No	Toxicity of silver and copper to Cucurbita pepo: Differential effects of nano and bulk-size particles	Environmental Toxicology	2012	10.1002/tox.20667
Terrestrial	Soil	plant	plant	TiO2 NPs	growth	No	Effects of Titanium Dioxide Nanoparticles on Red Clover and Its Rhizobial Symbiont	Plos One	2016	10.1371/journal.pone.0155111
Terrestrial	Soil	plant	roots of wheat and canola	Ag nano	ammonia oxidation potential, respiration	No	Ecotoxicity and fate of a silver nanomaterial in an outdoor lysimeter study	Ecotoxicology	2017	10.1007/s10646-017-1805-4
Terrestrial	Soil	plant	plant	Palladium NPs	germination, development, mitotic division	No	Ecotoxicity of halloysite nanotube-supported palladium nanoparticles in Raphanus sativus L	Environmental Toxicology and Chemistry	2016	10.1002/etc.3412
Terrestrial	Soil	plant	plant	TiO2 NPs	ntioxidant enzymes, lipid peroxidation, gene expression	No	Titanium dioxide nanoparticles (100-1000 mg/l) can affect vitamin E response in Arabidopsis thaliana	Environmental Pollution	2016	10.1016/j.envpol.2016.03.026
Terrestrial	Soil	plant	lettuce	Iron NPs	germination, elongation	No	Ecotoxicological impact of two soil remediation treatments in Lactuca sativa seeds	Chemosphere	2016	10.1016/j.chemosphere.2016.06.002
Terrestrial	Soil	plant	plant (zucchini, soybean)	Ag NPs	bioaccumulation	Yes	Impact of Ag Nanoparticle Exposure on p,p '-DDE Bioaccumulation by Cucurbita pepo (Zucchini) and Glycine max (Soybean)	Environmental Science and Technologies	2013	10.1021/es3041829
Terrestrial	Soil	plant	plant (Arabidopsis thaliana)	CNT	growth, photosynthesis, oxidative stress	No	Multiwall carbon nanotubes modulate paraquat toxicity in Arabidopsis thaliana	Environmental Pollution	2017	10.1016/j.envpol.2017.10.116
Terrestrial	Soil	plant	tomato	Au NPs	uptake	Yes	Gold Nanomaterial Uptake from Soil Is Not Increased by Arbuscular Mycorrhizal Colonization of Solanum Lycopersicum (Tomato)	Nanomaterials	2016	10.3390/nano6040068
Terrestrial	Soil	plant	plant	CNT	viability, chlorophyll, root weight	No	Physiological responses induced in tomato plants by a two-component nanostructural system composed of carbon nanotubes conjugated with quantum dots and its in vivo multimodal detection	Nanotechnology	2011	10.1088/0957-4484/22/29/295101
Terrestrial	Soil	plant	lupin	TiO2 NPs, ZnO NPs	enzyme activity	No	Bioaccumulation, antioxidative response, and metallothionein expression in Lupinus luteus L. exposed to heavy metals and silver nanoparticles	Environmental Science and Pollution Research	2019	10.1007/s11356-019-04972-y
Terrestrial	Soil	plant	microflora	CuO and Ag NPs	enzymatic activity, diversity	No	Single versus repeated applications of CuO and Ag nanomaterials and their effect on soil microflora	Environmental Pollution	2016	10.1016/j.envpol.2016.05.028
Terrestrial	Soil	plant	plant	Ag NPs	growth	No	Multiwalled Carbon Nanotubes and C-60 Fullerenes Differentially Impact the Accumulation of Weathered Pesticides in Four Agricultural Plants	Environmental Science and Technology	2013	10.1021/es4034809
Terrestrial	Soil	plant	plant	CeO2 NPs	photosysinthesis, enzyme activity	Yes	Foliar exposure of the crop Lactuca sativa to silver nanoparticles: Evidence for internalization and changes in Ag speciation	Journal of Hazardous Materials	2014	10.1016/j.jhazmat.2013.10.053
Terrestrial	Soil	plant	plant	TiO2 and CeO2 NPs	germination, development	No	Germination and early plant development of ten plant species exposed to titanium dioxide and cerium oxide nanoparticles	Environmental Toxicology and Chemistry	2016	10.1002/etc.3374
Terrestrial	Soil	plant	plant	CdS quantum dots	growth, proteomic expression	No	The Proteomic Response of Arabidopsis thaliana to Cadmium Sulfide Quantum Dots, and Its Correlation with the Transcriptomic Response	Frontiers in Plant Science	2015	10.3389/fpls.2015.01104
Terrestrial	Soil	plant	plant	TiO2 NPs	photosysinthesis, enzyme activityphytochelatin (PC) content	No	Fate of pristine TiO2 nanoparticles and aged paint-containing TiO2 nanoparticles in lettuce crop after foliar exposure	Journal of Hazardous Materials	2014	10.1016/j.jhazmat.2014.03.014
Terrestrial	Soil	plant	plant	CNT	enzyme activity	No	Carboxylated multi-walled carbon nanotubes exacerbated oxidative damage in roots of Vicia faba L. seedlings under combined stress of lead and cadmium	Ecotoxicology and Environmental Safety	2018	10.1016/j.ecoenv.2018.06.034
Terrestrial	Soil	plant	plant	ZnO NPs	gene expression	No	Synergistic Effect of Zinc Oxide Nanoparticles and Heat Stress on the Alleviation of Transcriptional Gene Silencing in Arabidopsis thaliana	Bulletin of Environmental Contamination and Toxicology	2020	10.1007/s00128-019-02749-0
Terrestrial	Soil	plant	wheat	Ag NPs	morphology, gene transcription, rhizosphere microorganisms	No	Synergetic toxicity of silver nanoparticle and glyphosate on wheat (Triticum aestivum L.)	Science of the Total Environment	2021	10.1016/j.scitotenv.2021.149200
Terrestrial	Soil	plant	plant	DM and Ag NPs	growth, photosynthesis, antioxidant system	No	The interactive effects of diclofop-methyl and silver nanoparticles on Arabidopsis thaliana: Growth, photosynthesis and antioxidant system	Environmental Pollution	2018	10.1016/j.envpol.2017.09.034
Terrestrial	Air	lichen	lichen	CNT	cell viability, photosinthesis	Yes	Physiological changes of the lichen Parmotrema tinctorum as result of carbon nanotubes exposition	Ecotoxicology and Environmental Safety	2015	10.1016/j.ecoenv.2015.05.034
Terrestrial	Soil	invertebrate	arthropod	Ag NPs	reproduction	No	Is a Water Content of 60% Maximum Water Holding Capacity Suitable for Folsomia candida Reproduction Tests? A Study with Silver Nanoparticles and AgNO3	International Journal of Environmental Research and Public Health	2018	10.3390/ijerph15040652
Terrestrial	Soil	invertebrate	earthworm	ZnO NPs	survival, weight change, reproduction	No	Effects of aging and soil properties on zinc oxide nanoparticle availability and its ecotoxicological effects to the earthworm Eisenia andrei	Environmental Toxicology and Chemistry	2017	10.1002/etc.3512
Terrestrial	Soil	invertebrate	nematode	Iron NPs	gene expression trhough transcritptomic analysis	No	Ecotoxicogenomic analysis of stress induced on Caenorhabditis elegans in heavy metal contaminated soil after nZVI treatment	Chemosphere	2020	10.1016/j.chemosphere.2020.126909
Terrestrial	Soil	invertebrate	earthworm	TiO2 NPs	mortality, apoptosis	No	Ecotoxicological effects of an aged TiO2 nanocomposite measured as apoptosis in the anecic earthworm Lumbricus terrestris after exposure through water, food and soil	Environmental International	2011	10.1016/j.envint.2011.01.009
Terrestrial	Soil	invertebrate	earthworm	C-60 NPs	mortality, growth, reproduction	No	Effects of C-60 nanoparticle exposure on earthworms (Lumbricus rubellus) and implications for population dynamics	Environmental Pollution	2011	10.1016/j.envpol.2010.09.003
Terrestrial	Soil	invertebrate	nematode	TiO2 NPs	reproduction, lifespan, vulval integrity	No	Comparative toxicity of a food additive TiO2, a bulk TiO2, and a nano-sized P25 to a model organism the nematode C-elegans	Environmental Science and Pollution Research	2019	10.1007/s11356-018-3810-4
Terrestrial	Soil	invertebrate	earthworm	Ag NPs	enzyme activity	No	Ecotoxicity of silver nanoparticles on earthworm Eisenia fetida: responses of the antioxidant system, acid phosphatase and ATPase	Toxicology and Environmental Chemistry	2012	10.1080/02772248.2012.668020
Terrestrial	Soil	invertebrate	earthworm	C-60 NPs	tisssue damage, gene expression	No	C-60 exposure induced tissue damage and gene expression alterations in the earthworm Lumbricus rubellus	Nanotoxicology	2013	10.3109/17435390.2012.668569
Terrestrial	Soil	invertebrate	anellid	Ag NPs	survival, reproduction	No	Biochar alleviates the toxicity of imidacloprid and silver nanoparticles (AgNPs) to Enchytraeus albidus (Oligochaeta)	Environmental Science and Pollution Research	2018	10.1007/s11356-018-1383-x
Terrestrial	Soil	invertebrate	nematode	CeO2 and TiO2 NPs	gene expression, growth, fertility, survival	No	Ecotoxicological investigation of CeO2 and TiO2 nanoparticles on the soil nematode Caenorhabditis elegans using gene expression, growth, fertility, and survival as endpoints	Environmental Toxicology and Pharmacology	2010	10.1016/j.etap.2009.12.003
Terrestrial	Soil	invertebrate	earthworm	Ag NPs	viability	No	Selection of an optimal culture medium and the most responsive viability assay to assess AgNPs toxicity with primary cultures of Eisenia fetida coelomocytes	Ecotoxicology and Environmental Safety	2019	10.1016/j.ecoenv.2019.109545
Terrestrial	Soil	invertebrate	earthworm	Ag NPs	mortality, weight loss of individuals, metallothionein concentration, enzyme activity, cell viability	No	Responses to silver nanoparticles and silver nitrate in a battery of biomarkers measured in coelomocytes and in target tissues of Eisenia fetida earthworms	Ecotoxicology and Environmental Safety	2017	10.1016/j.ecoenv.2017.03.008
Terrestrial	Soil	invertebrate	oligochaete	Ni NPs	hatching, growth, survival, reproduction	No	Hazard assessment of nickel nanoparticles in soilThe use of a full life cycle test with Enchytraeus crypticus	Environmental Toxicology and Chemistry	2017	10.1002/etc.3853
Terrestrial	Soil	invertebrate	worm	ZnO NMs	behaviour, oxidative stress	No	Assessing the acute hazards of zinc oxide nanomaterials to Lumbriculus variegatus	Ecotoxicology	2015	10.1007/s10646-015-1515-8
Terrestrial	Soil	invertebrate	isopod	Ag NPs	survival, bioavailability	Yes	Bioavailability of cobalt and iron from citric-acid-adsorbed CoFe2O4 nanoparticles in the terrestrial isopod Porcellio scaber	Science of the Total Environment	2015	10.1016/j.scitotenv.2014.11.080
Terrestrial	Soil	invertebrate	earthworm	TiO2 NPs	survival, growth, histopathology	No	Toxicological impact of TiO2 nanoparticles on Eudrilus euginiae	The Institution of Engineering and Technology	2018	10.1049/iet-nbt.2017.0240
Terrestrial	Soil	invertebrate	nematode	ZnO NPs	mortality	Yes	Toxicity and uptake of nanoparticulate and bulk ZnO in nematodes with different life strategies	Ecotoxicology	2018	10.1007/s10646-018-1959-8
Terrestrial	Air	invertebrate	bean weevil - coleotter	TiO2 NPs	survival, progeny	No	Insecticidal impact of alumina powders against Acanthoscelides obtectus (Say)	Journal of Stored Products Research	2018	10.1016/j.jspr.2018.02.006
Terrestrial	Air	invertebrate	fly	SiO2 NPs	histopathological biomarker	No	Histopathology of Chironomus riparius (Diptera, Chironomidae) exposed to metal oxide nanoparticles	Archives of Biological Sciences	2021	10.2298/ABS210515025S
Terrestrial	Soil	invertebrate	worms (oligochaetes)	Ag NPs	behaviour	Yes	Effects of Amorphous Silica Nanopowders on the Avoidance Behavior of Five Soil Species-A Screening Study	Nanomaterials	2020	10.3390/nano10030402
Terrestrial	Soil	invertebrate	oligochaete	Cu NPs	gene expression	No	Effect of Cu-nanoparticles versus Cu-salt in Enchytraeus albidus (Oligochaeta): Differential gene expression through microarray analysis	Comparative Biochemistry Physiology Part C Toxicology and Pharmacology	2012	10.1016/j.cbpc.2011.08.008
Terrestrial	Soil	invertebrate	nematode	Ag NPs	survival, growth, reproduction, gene expression	No	Ecotoxicity of Silver Nanoparticles on the Soil Nematode Caenorhabditis elegans Using Functional Ecotoxicogenomics	Environmental Science and Technologies	2009	10.1021/es803477u
Terrestrial	Soil	invertebrate	anellid worm	CuO NMs	growth, hatching, development	No	Effects of copper oxide nanomaterials (CuONMs) are life stage dependent - full life cycle in Enchytraeus crypticus	Environmental Pollution	2017	10.1016/j.envpol.2017.01.067
Terrestrial	Soil	invertebrate	earthworm	TiO2 NPs	gene expression, DNA damage	No	Ecotoxicological assessment of TiO2 byproducts on the earthworm Eisenia fetida	Environmental Pollution	2011	10.1016/j.envpol.2011.05.024
Terrestrial	Soil	invertebrate	earthworm	ZnO and TiO2 NPs	mortality, reproduction	No	Acute and reproductive toxicity of nano-sized metal oxides (ZnO and TiO2) to earthworms (Eisenia fetida)	Journal of Environmental Monitoring	2011	10.1039/c1em10497g
Terrestrial	Soil	invertebrate	earthworm	C-60 NPs	survival, biomass	Yes	Effect of C-60 fullerenes on the accumulation of weathered p,p '-dde by plant and earthworm species under single and multispecies conditions	Environmental Toxicology and Chemistry	2013	10.1002/etc.2158
Terrestrial	Soil	invertebrate	earthworm	Co and Ag NPs	bioavailability	Yes	Bioavailability of cobalt and silver nanoparticles to the earthworm Eisenia fetida	Nanotoxicology	2012	10.3109/17435390.2011.569094
Terrestrial	Air	invertebrate	bees	fullerenol NPs	oxidative stress	No	Effect of fullerenol nanoparticles on oxidative stress induced by paraquat in honey bees	Environmental Science and Pollution Research International	2020	10.1007/s11356-019-07385-z
Terrestrial	Soil	invertebrate	earthworm	CNT	depuration behaviour	Yes	Ecological uptake and depuration of carbon nanotubes by Lumbriculus variegatus	Environmental Health Perspective	2008	10.1289/ehp.10883
Terrestrial	Soil	invertebrate	snail	TiO2 NPs, CNT	oxidative stress	No	Potential toxic effects of titanium dioxide nanoparticles and carbon nanotubes on land snail Helix aspersa: use of oxidative stress as a reliable biomarker for ecotoxicology assessment	Invertebrate Survival Journal	2021	10.25431/1824-307X/isj.v18i1.119-129
Terrestrial	Soil	invertebrate	earthworm	TiO2 NPs	mortatity, reproduction, avoidance, growth	No	Reproductive and behavioral responses of earthworms exposed to nano-sized titanium dioxide in soil	Environmental Toxicology and Chemistry	2012	10.1002/etc.714
Terrestrial	Soil	invertebrate	chironomus, fly	C-60 NPs	growth	No	The chronic effects of fullereneC(60)-associated sediments in the midge Chironomus riparius - Responses in the first and the second generation	Environmental Pollution	2017	10.1016/j.envpol.2017.06.015
Terrestrial	Soil	invertebrate	insect	Silica, Sb2O5, Fe2O3 NMs	enzyme activity, growth, DNA damage	No	Assessment of the effect of nanomaterials on sediment-dwelling invertebrate Chironomus tentans larvae	Ecotoxicology and Environmental Safety	2011	10.1016/j.ecoenv.2010.12.012
Terrestrial	Soil	invertebrate	invertebrate	Silica NPs	suurvival, reproduction	No	Effects of europium polyoxometalate encapsulated in silica nanoparticles (nanocarriers) in soil invertebrates	Journal of Nanoparticle Research	2016	10.1007/s11051-016-3662-0
Terrestrial	Soil	invertebrate	isopod	Ag and CeO2 NPs	feeding, behaviour	No	Avoidance behaviour of isopods (Porcellio scaber) exposed to food or soil contaminated with Ag- and CeO2-nanoparticles	Applied Soil Ecology	2019	10.1016/j.apsoil.2019.05.011
Terrestrial	Mammals	vertebrates	human, Structure activity relationship analysis	CNT, TiO2 NPs, CdSe/ZnS NPs	mechanism-based structure activity relationship	No	Approach to using mechanism-based structure activity relationship (SAR) analysis to assess human health hazard potential of nanomaterials	Food Chem Toxicology	2015	10.1016/j.fct.2015.06.008
Terrestrial	Mammals	vertebrates	chicks	ZnO NPs	behaviour	No	The effects of predicted environmentally relevant concentrations of ZnO nanoparticles on the behavior of Gallus gallus domesticus (Phasianidae) chicks	Environmental Pollution	2018	10.1016/j.envpol.2018.08.004
Terrestrial	Mammals	vertebrates	human cell lines	Ag, Au, ZrO2, CeO2, TiO2 and Al2O3 NPs, C-60, graphene NPs	cell viability, oxidative stress	No	Cytotoxic effects of commonly used nanomaterials and microplastics on cerebral and epithelial human cells	Environmental Research	2017	10.1016/j.envres.2017.08.043
Terrestrial	Mammals	vertebrate	mammalian cell lines	CuO NPs	cell viability	No	Interactions of polymeric drug carriers with DDT reduce their combined cytotoxicity	Environmental Pollution	2018	10.1016/j.envpol.2018.06.010
Terrestrial	Mammals	vertebrate	mouse	Ag NPs	morphology, nitric oxide levels, phagocytosis	No	Toxicological interactions of silver nanoparticles and organochlorine pesticides in mouse peritoneal macrophages	Toxicology Mechanisms and Methods	2016	10.3109/15376516.2016.1159770
Terrestrial	Mammals	vertebrate	mouse	CNT	gene expression	No	Prenatal exposure to paraquat and nanoscaled TiO2 aerosols alters the gene expression of the developing brain	Chemosphere	2021	10.1016/j.chemosphere.2021.132253
Terrestrial	Comparative	plant, invertebrate	plant, earthworm	Ag NPs	growth, survival, reproduction	No	A comparison of the effects of silver nanoparticles and silver nitrate on a suite of soil dwelling organisms in two field soils	Nanotoxicology	2016	10.1080/17435390.2016.1181807
Terrestrial	Comparative	bacteria, plant	microorg, plant	Ag NPs	growth	No	Long-term effects of three different silver sulfide nanomaterials, silver nitrate and bulk silver sulfide on soil microorganisms and plants	Environmental Pollution	2018	10.1016/j.envpol.2018.07.082
Terrestrial	Comparative	bacteria, invertebrate	bacteria, nematode	Ag NPs	germination, reproduction	No	Insights into the Ecotoxicity of Silver Nanoparticles Transferred from Escherichia coli to Caenorhabditis elegans	Scientific Reports	2016	10.1038/srep36465
Terrestrial	Comparative	bacteria, protozoa	soil bacteria, protozoans	C-60 NPs	respiration, microbial biomass, growth	No	Effects of C-60 fullerene nanoparticles on soil bacteria and protozoans	Environmental Toxicology and Chemistry	2008	10.1897/07-375.1
Terrestrial	Comparative	plant, bacteria	germination test, luminescent bacteria inhibition	Iron NPs	germination, enzyme activity	No	Activation of peroxydisulfate by nanoscale zero-valent iron for sulfamethoxazole removal in agricultural soil: Effect, mechanism and ecotoxicity	Chemosphere	2019	10.1016/j.chemosphere.2019.02.074
Terrestrial	Comparative	plant, invertebrate	plant, invertebrate	TiSiO4 NMs	growth, reproduction	No	Ecotoxicity of titanium silicon oxide (TiSiO4) nanomaterial for terrestrial plants and soil invertebrate species	Ecotoxicology and Environmental Safety	2016	10.1016/j.ecoenv.2016.03.038
Terrestrial	Comparative	bacteria, invertebrate	bacteria, crustacean	TiO2, SiO2, and ZnO NPs	growth, ROS production	No	Comparative eco-toxicity of nanoscale TiO2, SiO2, and ZnO water suspensions	Water Research	2006	10.1016/j.watres.2006.08.004
Terrestrial	Comparative	bacteria, plant	plant, microorg	Au, Ag and Fe2O3 NPs	germination, bioluminescence, metabolic rate	No	Evaluation of the ecotoxicity of model nanoparticles	Chemosphere	2009	10.1016/j.chemosphere.2009.01.078
Terrestrial	Comparative	fungi, vertebrate	fungi, vertebrates	WS2 nanomatetrials	ROS production	No	Toxicological assessment of commercial monolayer tungsten disulfide nanomaterials aqueous suspensions using human A549 cells and the model fungus Saccharomyces cerevisiae	Chemosphere	2021	10.1016/j.chemosphere.2021.129603
Terrestrial	Comparative	fungi, yeast	antimicrobial activity	TiO2, ZrO2, Fe-0, Fe2O3 and Mn2O3 NPs	metabolism, membrane damage	No	Toxicity of TiO2, ZrO2, Fe-0, Fe2O3, and Mn2O3 nanoparticles to the yeast, Saccharomyces cerevisiae	Chemosphere	2013	10.1016/j.chemosphere.2013.06.075
Terrestrial	Comparative	fungi, yeast	yeast-fungi	HfO2, SiO2, Al2O3 and CeO2 NPs	oxygen consumption, cell membrane integrity	No	Low toxicity of HfO2, SiO2, Al2O3 and CeO2 nanoparticles to the yeast, Saccharomyces cerevisiae	Journal of Hazardous Materials	2011	10.1016/j.jhazmat.2011.06.081
Terrestrial	Comparative	plant, invertebrate	macroinvertebrates, macrophytes	CNT	development	No	Multiwalled Carbon Nanotubes at Environmentally Relevant Concentrations Affect the Composition of Benthic Communities	Environmental Science and Technologies	2013	10.1021/es400777j
