# Supplementary material for: Nanomaterial Ecotoxicology in the Terrestrial and Aquatic Environment: A Systematic Review
Source: MDPI journal article supplement (doi:10.3390/toxics10070393), 2022-07-14
Supplement: s1 [file Gambardella & Pinsino_Table S3.xlsx]

## Sheet: Suppl. Mat. 3_Comparative
Environment	Target organism	Organism	Endpoint/Response	Nanomaterial	Uptake	Article Title	Journal	Published year	DOI
Comparative	vertebrates, invertebrates	fish, lizard	cell viability	Porphyrine NMs	No	In vitro toxi- and ecotoxicological assessment of porphyrine nanomaterials by flow cytometry using nucleated erythrocytes	Carpathian Journal of Earth and Environmental Sciences	2011	n.a.
Comparative	invertebrates	nematode, collembola	reproduction	ZnO NPs	No	Effects of Zinc Oxide Nanoparticles on Panagrellus redivivus (Nematoda) and Folsomia candida (Collembola) in Various Test Media	International Journal of Environmental Research	2018	10.1007/s41742-018-0086-y
Comparative	bacteria	biofilm	cell viability, ROS production	TiO2 NPs	No	Nanostructured TiO2: Transport Behavior and Effects on Aquatic Microbial Communities under Environmental Conditions	Environmental Science and Technologies	2009	10.1021/es9017046
Comparative	invertebrates	crustacean, anellid	mortality	Ag NPs	Yes	Accumulation Dynamics and Acute Toxicity of Silver Nanoparticles to Daphnia magna and Lumbriculus variegatus: Implications for Metal Modeling Approaches	Environmental Science and Technologies	2015	10.1021/es506124x
Comparative	plants, invertebrates	crustacean, plant	immobility, reproduction, growth, germination	Ag NPs	No	Ecotoxicity Evaluation of Pristine and Indolicidin-coated Silver Nanoparticles in Aquatic and Terrestrial Ecosystem	International Journal of Nanomedicine	2020	10.2147/IJN.S260396
Comparative	algae, bacteria, vertebrates	algae,bacteria, mammalian cell lines	metabolic activity, bioluminescence inhibition	PAMAM-coated Au NPs	No	Toxicity of PAMAM-Coated Gold Nanoparticles in Different Unicellular Models	Environmental Toxicology	2014	10.1002/tox.21761
Comparative	vertebrates	fish, human	DNA alteration, ROS production	ZnO NPs	No	Comparative cytotoxicity induced by bulk and nanoparticulated ZnO in the fish and human hepatoma cell lines PLHC-1 and Hep G2	Nanotoxicology	2013	10.3109/17435390.2012.676098
Comparative	vertebrates, plants	cells, mammal, plant	cell viability, apoptosis	Ag NPs	No	In vitro and in vivo genotoxicity of silver nanoparticles	Mutation Research-Genetic Toxicology and Environmental Mutagenesis	2012	10.1016/j.mrgentox.2012.08.007
Comparative	vertebrates, invertebrates, plant	human cell, crustaean, fish, root tips	immobilization, germination, survival	Fe NPs	No	Comparative ecotoxicity assessment of magnetosomes and magnetite nanoparticles	International Journal of Environmental Health Research	2020	10.1080/09603123.2019.1570489
Comparative	plants, invertebrates	plant, insect, crustacean	root elongation, reproduction, DNA damage	ZnO NPs	No	Investigation of ZnO nanoparticles' ecotoxicological effects towards different soil organisms	Environmental Science and Pollution Research	2011	10.1007/s11356-010-0421-0
